# Supplementary material for: Interfacial waveforms in chiral lattices with gyroscopic spinners
Source: PubMed Central journal article supplement (PMC6083240; doi:10.1098/rspa.2018.0132), 2018-07-25
Supplement: rspa20180132supp3.pdf [file rspa20180132supp3.pdf]

# Supplementary Material

**Title:** Interfacial waveforms in chiral lattices with gyroscopic spinners

**Authors:** M. Garau<sup>1</sup>, G. Carta<sup>2</sup>, M.J. Nieves<sup>3,1,\*</sup>, I.S. Jones<sup>2</sup>, N.V. Movchan<sup>4</sup>, A.B. Movchan<sup>4</sup>

<sup>1</sup> Keele University, School of Computing and Mathematics, Keele, ST5 5BG, UK

<sup>2</sup> Liverpool John Moores University, Mechanical Engineering and Materials Research Centre, Liverpool, L3 3AF, UK

<sup>3</sup> University of Cagliari, Department of Mechanical, Chemical and Material Engineering, Cagliari, 09123, Italy

<sup>4</sup> University of Liverpool, Department of Mathematical Sciences, Liverpool, L69 7ZL, UK

\* Corresponding author

Email address of the corresponding author: m.nieves@keele.ac.uk

## Determination of the spinner constant $\alpha$

Each particle of the lattice is connected to a gyroscopic spinner, shown in Fig. S1. The gyroscopic spinner is pinned at the bottom end, where it can rotate but cannot translate. We denote by  $\psi$ ,  $\phi$  and  $\theta$  the angles of spin, precession and nutation, respectively.

The equations of motion of the gyroscopic spinner are given by [1]

$$M_{x'} = I_0 \ddot{\theta} + (I - I_0) \dot{\phi}^2 \sin(\theta) \cos(\theta) + I \dot{\phi} \dot{\psi} \sin(\theta), \quad (\text{S1a})$$

$$M_{y'} = I_0 \ddot{\phi} \sin(\theta) + (2I_0 - I) \dot{\phi} \dot{\theta} \cos(\theta) - I \dot{\theta} \dot{\psi}, \quad (\text{S1b})$$

$$M_{z'} = M_z = I \left[ \ddot{\phi} \cos(\theta) - \dot{\phi} \dot{\theta} \sin(\theta) + \ddot{\psi} \right]. \quad (\text{S1c})$$

Since the displacement of the lattice particle is small, the nutation angle of the gyroscopic spinner is also small, namely  $|\theta| \ll 1$ . Accordingly, the equations of

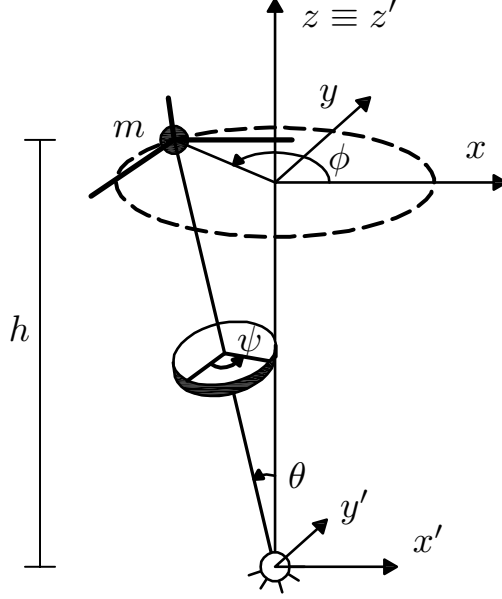

Figure S1: Schematic representation of a gyroscopic spinner.

motion (S1) to leading order take the form:

$$M_{x'} = I_0 \ddot{\theta} + (I - I_0) \dot{\phi}^2 \theta + I \dot{\phi} \dot{\psi} \theta, \quad (\text{S2a})$$

$$M_{y'} = I_0 \ddot{\phi} \theta + (2I_0 - I) \dot{\phi} \dot{\theta} - I \dot{\theta} \dot{\psi}, \quad (\text{S2b})$$

$$M_{z'} = M_z = I (\ddot{\phi} - \dot{\phi} \dot{\theta} \theta + \ddot{\psi}). \quad (\text{S2c})$$

We assume that the spin and precession rates are constant, i.e.  $\dot{\psi} = \text{Const} = \Omega$  and  $\dot{\phi} = \text{Const}$ . Furthermore, neglecting the effect of gravity,  $M_{x'} = M_{y'} = 0$ . Hence, we obtain:

$$0 = I_0 \ddot{\theta} + (I - I_0) \dot{\phi}^2 \theta + I \Omega \dot{\phi} \theta, \quad (\text{S3a})$$

$$0 = (2I_0 - I) \dot{\phi} \dot{\theta} - I \Omega \dot{\theta}, \quad (\text{S3b})$$

$$M_{z'} = M_z = -I \dot{\phi} \dot{\theta} \theta. \quad (\text{S3c})$$

Here, Eq. (S3b) leads to

$$\dot{\phi} = \frac{I}{2I_0 - I} \Omega. \quad (\text{S4})$$

In the time-harmonic regime, the nutation angle has the form  $\theta = \Theta e^{i\omega t}$ , where  $\omega$  is the radian frequency of the lattice. Substituting this form into Eq. (S3a) and

using Eq. (S4), we determine the following *compatibility condition* between the spin rate  $\Omega$  and the radian frequency  $\omega$ :

$$\Omega = \pm \frac{2I_0 - I}{I} \omega. \quad (\text{S5})$$

Comparing Eqs. (S4) and (S5), we observe that  $\dot{\phi} = \pm\omega$ .

Finally, using Eq. (S3c), we derive the expression for the moment  $M_z$  imposed by the gyroscopic spinner on the lattice particle attached to it:

$$M_z = \mp i \omega^2 \theta^2. \quad (\text{S6})$$

In the linearised case, the nutation angle is given by  $\theta = |\mathbf{u}|/h$ , where  $|\mathbf{u}|$  is the magnitude of the (in-plane) particle displacement and  $h$  is the height of the spinner (see Fig. S1). Hence, the force applied to the lattice particle by the gyroscopic spinner is

$$F = \frac{M_z}{|\mathbf{u}|} = \mp i \frac{I}{h^2} \omega^2 |\mathbf{u}|. \quad (\text{S7})$$

Consequently, the spinner constant appearing in Eqs. (2.1) and (3.1) of the main text is given by

$$\alpha = \frac{I}{h^2}, \quad (\text{S8})$$

as also shown in [2].

## References

- [1] Goldstein H, Poole C, Safko J. 2002 *Classical Mechanics*, 3rd edition. San Francisco: Addison Wesley.
- [2] Brun M, Jones IS, Movchan AB. 2012 Vortex-type elastic structured media and dynamic shielding. *Proc. R. Soc. A* **468**, 3027–3046. (doi: 10.1098/rspa.2012.0165)
